# Supplementary material for: Quantification of silver nanoparticles taken up by single cells using inductively coupled plasma mass spectrometry in the single cell measurement mode
Source: Royal Society of Chemistry journal article supplement (doi:10.1039/c7ja00395a), 2018-01-01
Supplement: c7ja00395a1.pdf [file c7ja00395a1.pdf]

**ESI Supporting Information**

**Quantification of silver nanoparticles up taken by single cells using Inductively Coupled Plasma Mass Spectrometry in the single cell mode**

**Ana Lopez-Serrano Oliver<sup>1</sup>, Sabine Baumgart<sup>2</sup>, Wolfram Bremser<sup>1</sup>, Sabine Flemig<sup>1</sup>, Doreen Wittke<sup>3</sup>,  
Andreas Grützkau<sup>2</sup>, Andrea Haase<sup>3</sup>, Andreas Luch<sup>3</sup>, Norbert Jakubowski<sup>1</sup>**

---

<sup>1</sup> Bundesanstalt für Materialforschung und –prüfung (BAM), Richard-Willstätter-Str. 11, 12489, Berlin Germany

<sup>2</sup> DRFZ, German Rheumatism Research Centre Berlin, Charitéplatz 1, 10117 Berlin, An Institute of Leibniz Association

<sup>3</sup> The Federal Institute for Risk Assessment Department of Product Safety (BfR), Max-Dohrn-Str. 8-10

D - 10589 Berlin.

**Table S-1. Typical operating parameters for the ICP-MS (Element XR/2).**

|                                                 |                                                                                                         |
|-------------------------------------------------|---------------------------------------------------------------------------------------------------------|
| Detector voltage                                | 1580-1650 V (for AgNPs and cell suspensions)<br>1900 V (for Ag standard solutions and digested samples) |
| Rf power/ W                                     | 1550                                                                                                    |
| Ar cooling gas flow rate/ L min <sup>-1</sup>   | 15                                                                                                      |
| Ar auxiliary gas flow rate/ L min <sup>-1</sup> | 1.0                                                                                                     |
| Sample and skimmer cone                         | Ni                                                                                                      |
| Micro nebulizer                                 | Micromist 200 µL                                                                                        |
| Data acquisition mode                           | Time Resolved Analysis (TRA) in counting mode                                                           |
| Isotopes                                        | <sup>107</sup> Ag; <sup>115</sup> In                                                                    |
| Sample uptake rate (mL min <sup>-1</sup> )      | 0.25                                                                                                    |
| Dwell time (ms)                                 | 0.1, 1, 10 (parameter optimized)                                                                        |
| Total acquisition time (s)                      | 52                                                                                                      |

**Table S-2. Determination of nebulization efficiency by using AgNPs aqueous suspension.** The transport efficiency,  $\epsilon$ , was determined by using AgNPs aqueous suspensions with known concentrations of particles  $\text{mL}^{-1}$  at a given flow rate

| AgNPs<br>$\text{ng mL}^{-1}$ | ng/particle           | AgNPs<br>particles $\text{mL}^{-1}$ | Events $\text{s}^{-1}$ | flow rate<br>$\text{mL s}^{-1}$ | $\epsilon$ | $\epsilon_{\text{mean}}$ |
|------------------------------|-----------------------|-------------------------------------|------------------------|---------------------------------|------------|--------------------------|
| $3 \times 10^{-2}$           | $6.86 \times 10^{-7}$ | $3.64 \times 10^{+4}$               | 3                      | 0.004                           | 0.02       | 0.02                     |
| $5 \times 10^{-2}$           |                       | $7.29 \times 10^{+4}$               | 5.09                   |                                 | 0.02       |                          |
| $1 \times 10^{-1}$           |                       | $1.46 \times 10^{+5}$               | 9.72                   |                                 | 0.02       |                          |

**Table S-3. Quantitative analysis of AgNPs in single cells by SC-ICP-MS.** The mode of the distribution and a 67% inter-quantile was selected in order to mimic the one-sigma of a normal distribution. An uncertainty u- and an uncertainty u+ are used due to the lower and upper bound of the heavily asymmetric quantile. Note that broken numbers (fractions) for the mode like 2.5 are a consequence of a distributed mode, and broken numbers for the uncertainties result from the very short left-tail with a zero zone as described above.

| Exposure time | Exposure dose                | THP-1 Monocytes |        |      |                    | THP-1 partially differentiated macrophages |        |      |                    |
|---------------|------------------------------|-----------------|--------|------|--------------------|--------------------------------------------|--------|------|--------------------|
|               |                              | mode            | u_down | u_up | 67% inter-quantile | mode                                       | u_down | u_up | 67% inter-quantile |
| (h)           | ( $\mu\text{g Ag mL}^{-1}$ ) | AgNP/cell       |        |      |                    | AgNP/cell                                  |        |      |                    |
| 4             | -                            | 0               | 0      | 0    | 0                  | 0                                          | 0      | 0    | 0                  |
| 24            | -                            | 0               | 0      | 0    | 0                  | 0                                          | 0      | 0    | 0                  |
| 4             | 0.1                          | 1               | 0,5    | 1    | 1,5                | 1                                          | 0,2    | 7    | 7,2                |
| 24            | 0.1                          | 1               | 0,5    | 1    | 1,5                | 3                                          | 1      | 3    | 4                  |
| 4             | 1                            | 2,5             | 0,3    | 1,5  | 1,8                | 2                                          | 0,2    | 40   | 40,2               |
| 24            | 1                            | 4               | 1      | 4    | 5                  | 4,5                                        | 2      | 54   | 56                 |

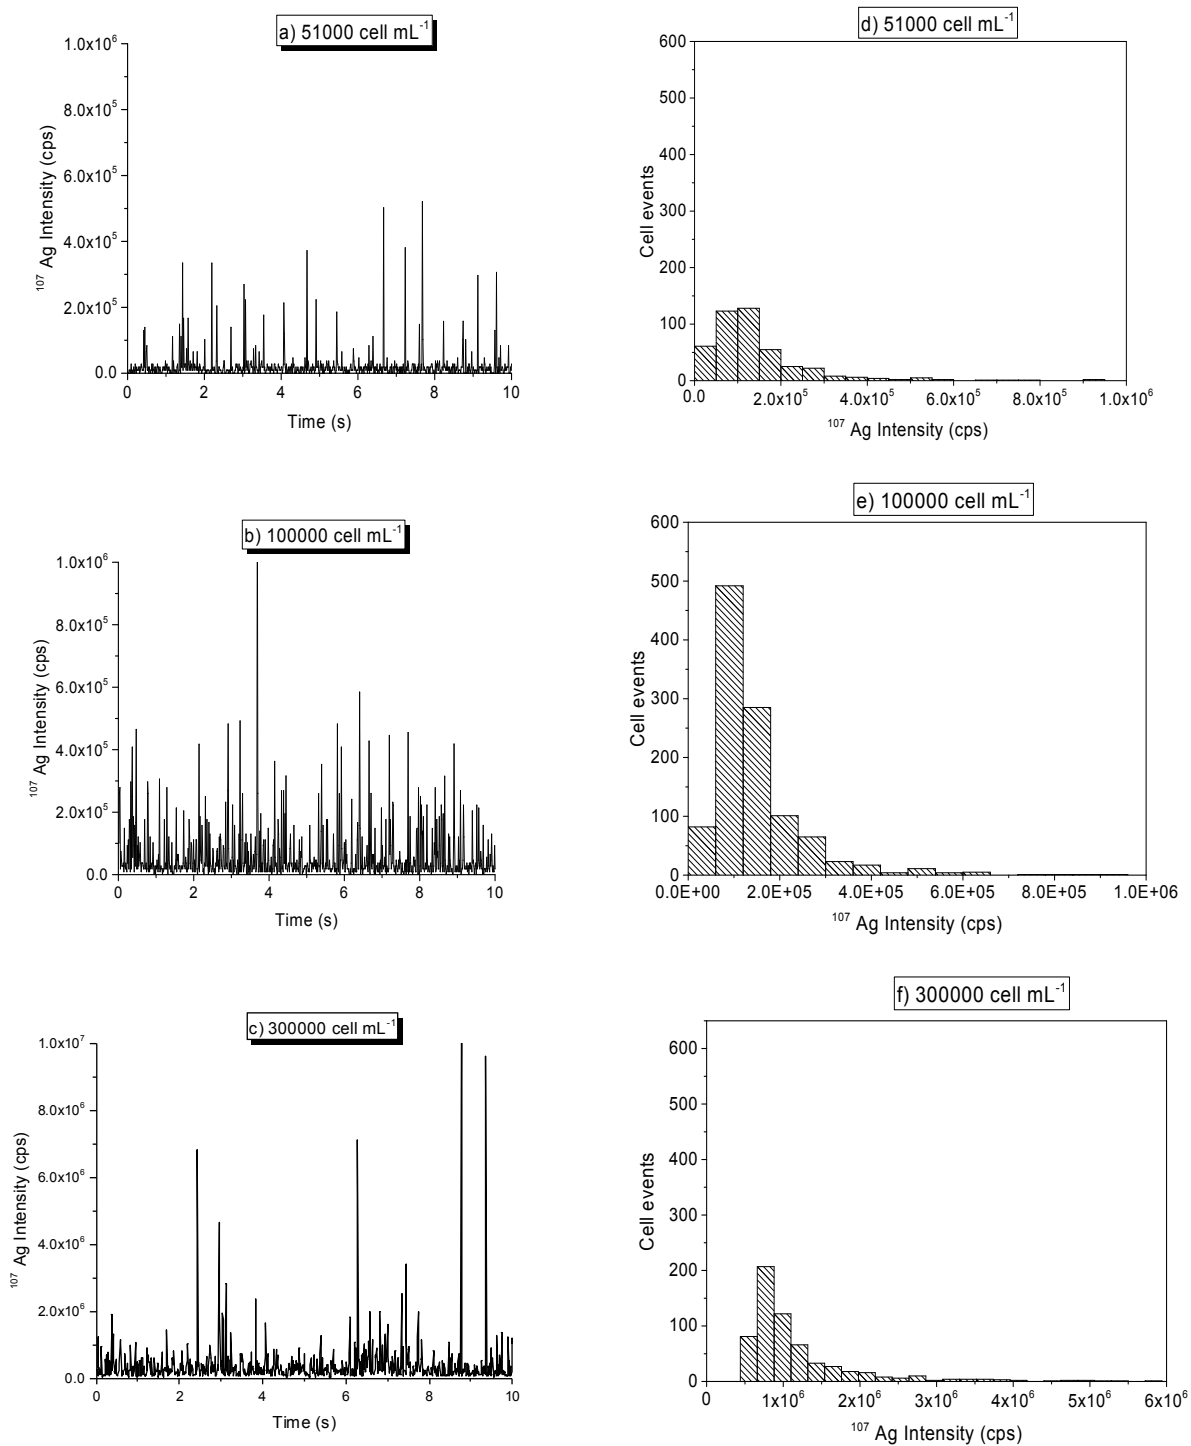

Figure S-1. Effects of different cell concentrations on the signal profile of single cells.  $^{107}\text{Ag}$  chromatograms (a-c) and histograms (e-f) at different concentrations of cell suspensions THP-1 monocytes incubated with  $1 \mu\text{g AgNPs mL}^{-1}$  for 24h.

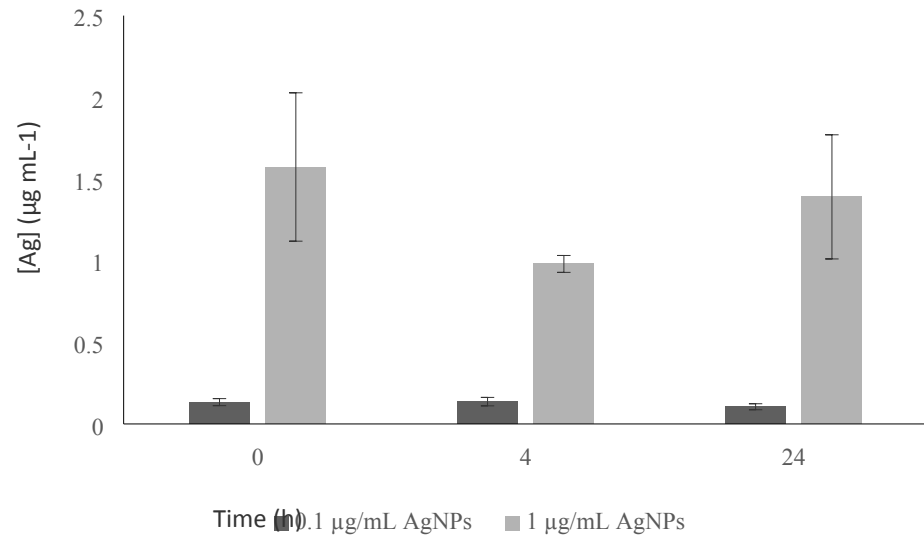

Figure S-2. Concentration of AgNPs , calculated as the absolute mass of Ag ( $\mu\text{g mL}^{-1}$ ) in the supernatant of the exposure/incubation medium after 4 and 24 h AgNPs exposure at 0.1 (black bars) and  $1\mu\text{g mL}^{-1}$  (gray bars) to THP-1 monocytes.

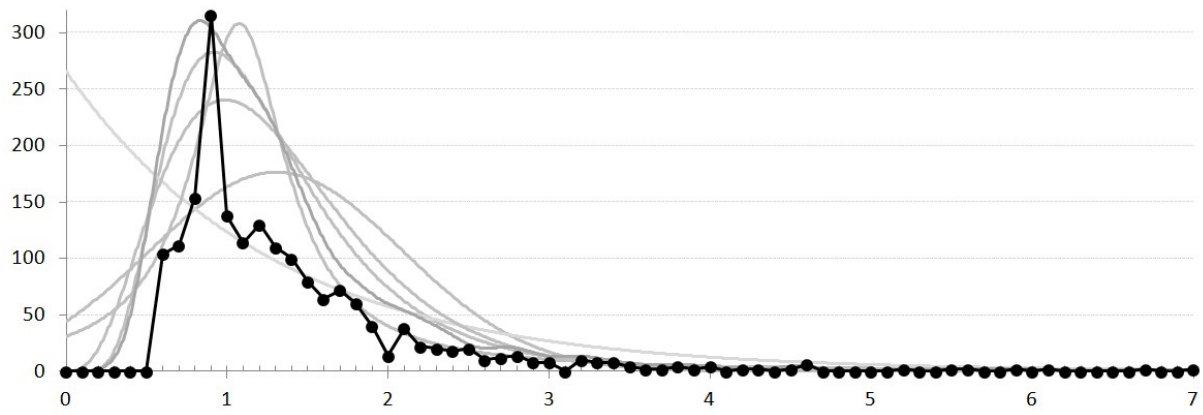

**Figure S-3.** Experimental event distribution (black dots) and fitted common distributions (grey lines): Normal, log-normal, exponential, Gamma, Lorentz distributions, and a Kernel smoothing.

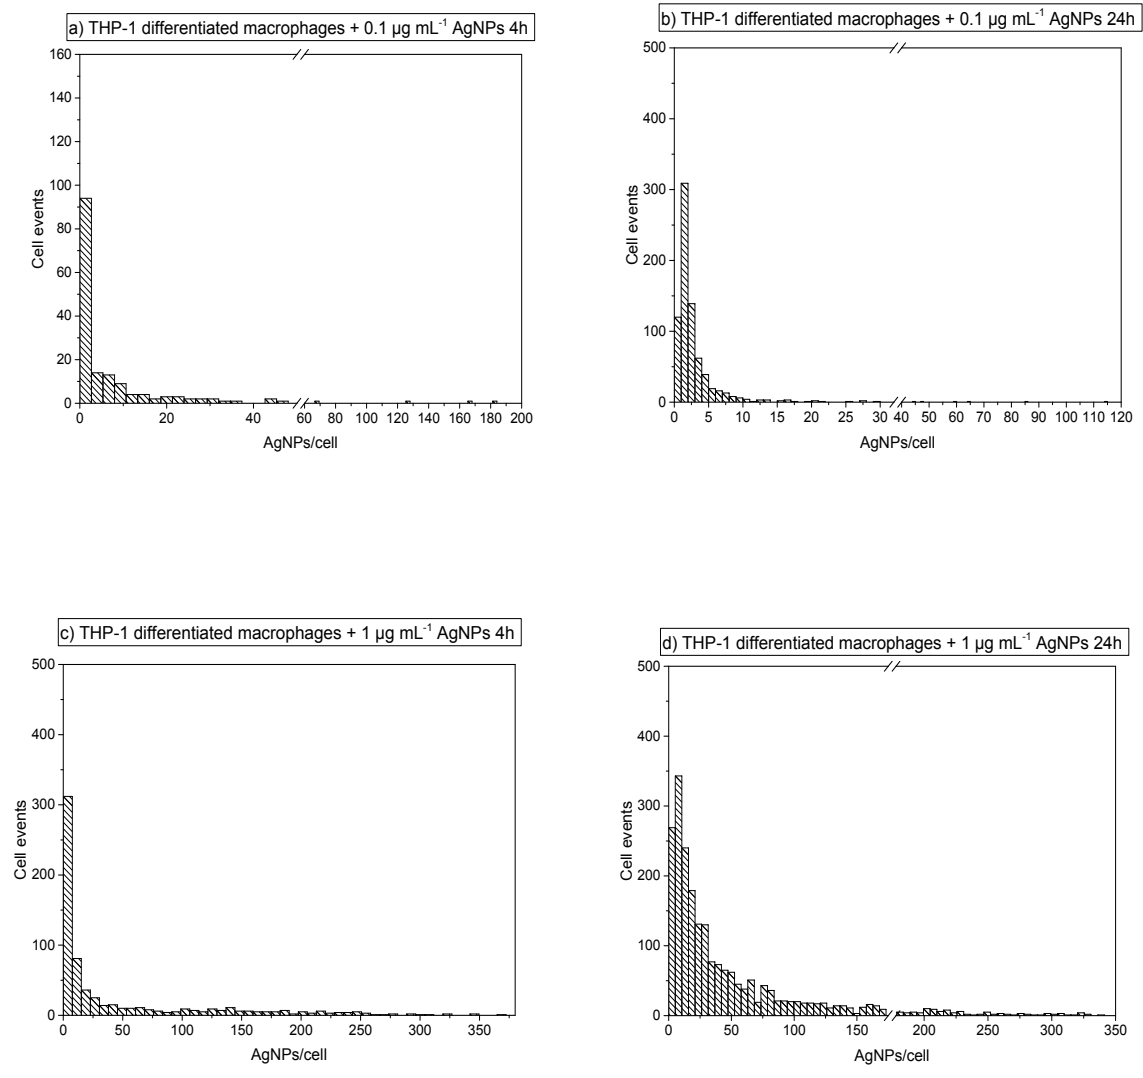

**Figure S-4.** SC-ICP-MS of THP-1 partially differentiated macrophages as single cell suspensions at a concentration of  $5 \times 10^4$ - $1 \times 10^5$  cell  $\text{mL}^{-1}$ . Histograms obtained of THP-1 partially differentiated macrophages incubated with 50 nm AgNPs at 0.1 (a-b) and 1  $\mu\text{g mL}^{-1}$  (c-d) for 4 and 24 hours. Results correspond to one biological experiment measured in two replicates.
